# Supplementary material for: Probiotic Lactobacillus reuteri biofilms produce antimicrobial and anti-inflammatory factors
Source: Springer Nature journal article supplement (doi:10.1186/1471-2180-9-35), 2009-01-01

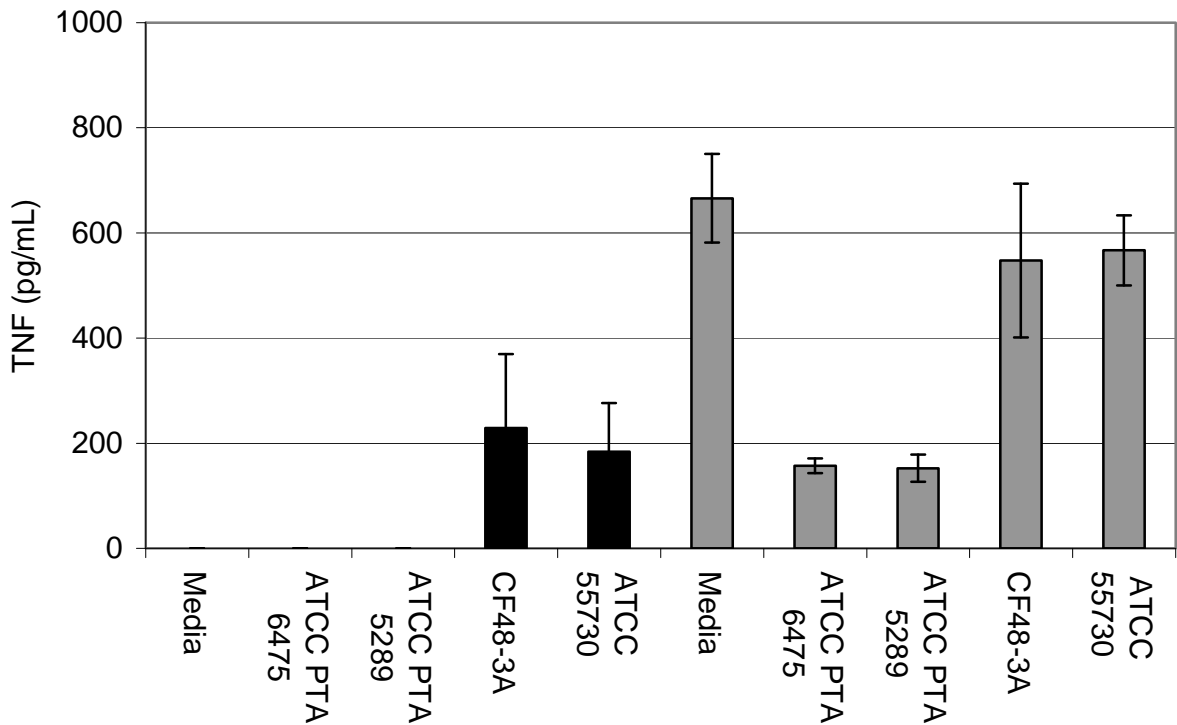

Supplement: 12866_2008_706_MOESM4_ESM.pdf [file 12866_2008_706_MOESM4_ESM.pdf]
